# Supplementary material
Source: PubMed Central journal article supplement (PMC6061995)
Supplement: NIHMS977394-supplement-Supplement_1.pdf [file NIHMS977394-supplement-Supplement_1.pdf]

## Supplementary Figure 1. Gel Source Data

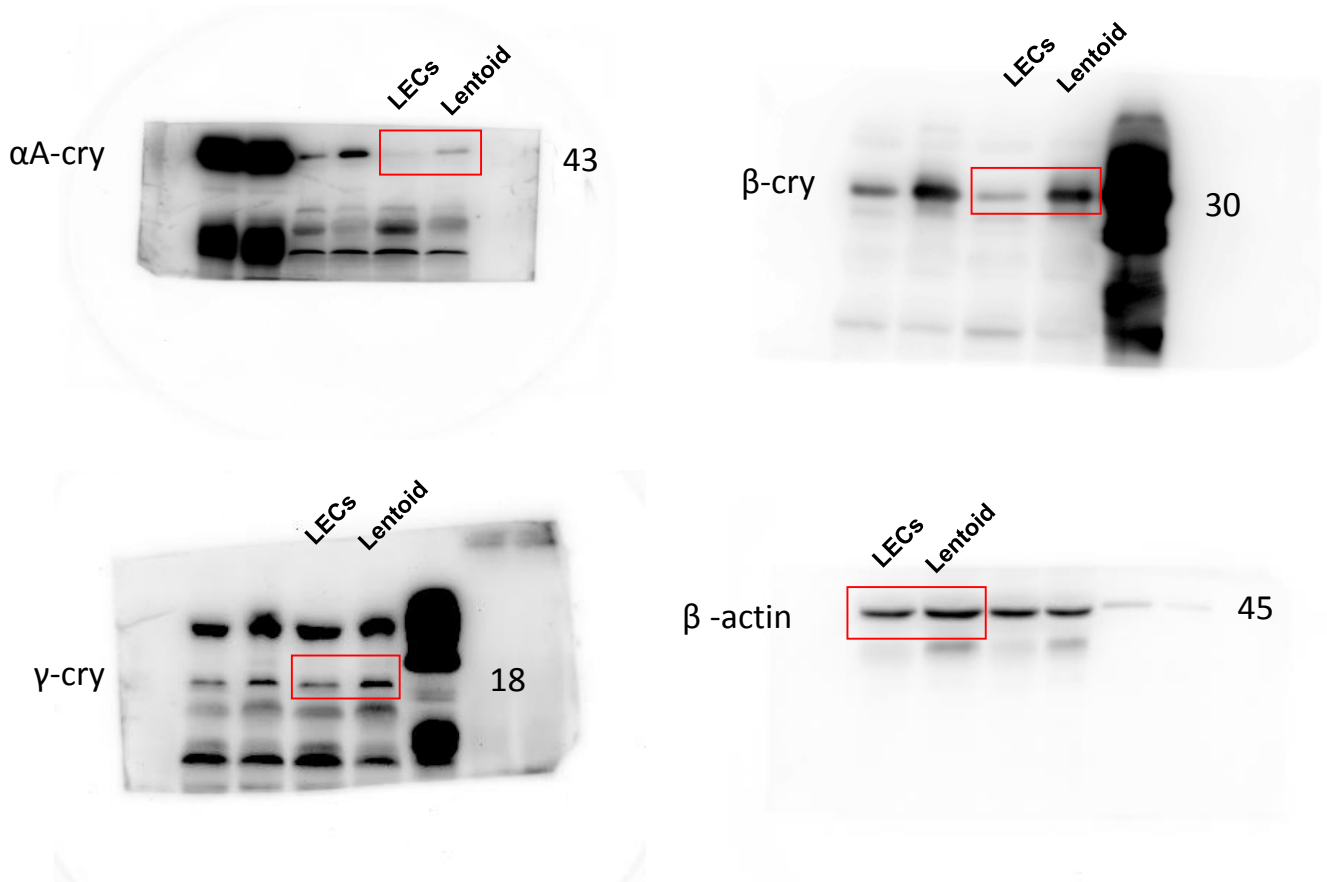

Supplementary Data Table 1. Primers Used for Real-Time PCR

| Gene (Human)          | Forward primer           | Reverse primer            |
|-----------------------|--------------------------|---------------------------|
| <i>c-Maf</i>          | GCCCAACCTGGTGGCTGTGTGCCT | AGACACCAGGTCCGGGCTGGGGTGC |
| <i>CP49</i>           | GCTTGGAGCAAGGCTCCTGCTT   | ACGTGAAGGTGCTGTACACAC     |
| <i>E-cadherin</i>     | GACTTCGAGGCGAAGCAGCAGT   | ATCTTCTGCTGCATGAATGTGTC   |
| <i>filensin</i>       | GACCCTGGAACAAGCTAT       | ATCCGATGGTACCGGTCCAGC     |
| <i>GAPDH</i>          | GCGAGATCCCGCCAACATCAAGT  | AGGATGCGTTGCTGACAATC      |
| <i>Pax6</i>           | GTATTCTTGCTTCAGGTAGAT    | GAGGCTCAAATGCGACTTCAGCT   |
| <i>Bmi1</i>           | GGTACTTCATTGATGCCACAACC  | CTGGTCTTGTGAACTTGGACATC   |
| <i>Sox2</i>           | GAACGCCTTCATGGTGTGGT     | AGCGTCTTGGTTTTCCGC        |
| <i>βB2-crystallin</i> | GCGAGTACCCTCGCTGGGACT    | ACGACACCTTCTCCTGGTAGC     |
| Gene (Mouse)          | Forward primer           | Reverse primer            |
| <i>Bmi1</i>           | ACTACACGCTAATGGACATTGCC  | CTCTCCAGCATTTCGTCAGTCCA   |
| <i>GAPDH</i>          | CATCACTGCCACCCAGAAGACTG  | ATGCCAGTGAGCTTCCCGTTCAG   |
| <i>PAX6</i>           | CTGAGGAACCAGAGAAGACAGG   | CATGGAACCTGATGTGAAGGAGG   |
| <i>SOX2</i>           | AACGGCAGCTACAGCATGATGC   | CGAGCTGGTCATGGAGTTGTAC    |
| <i>Ki67</i>           | ATCATTGACCGCTCCTTTAGGT   | GCTCGCCTTGATGGTTCCT       |
